# Supplementary material for: MRCNN: a deep learning model for regression of genome-wide DNA methylation
Source: PubMed Central journal article supplement (PMC6457069; doi:10.1186/s12864-019-5488-5), 2019-04-04

**Additional file 1. Distribution of the differences between the predicted value and the true value of all sites.**

The sites consist of hyper, hypo and mid groups. The distribution of the overall error is mainly concentrated around 0.1, indicating that MRCNN gives a precise regression of genome-wide methylation.

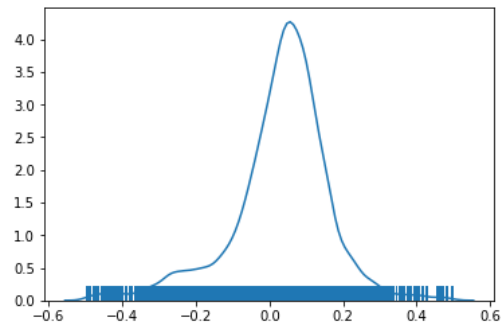

Supplement: 12864_2019_5488_MOESM1_ESM.pdf [file 12864_2019_5488_MOESM1_ESM.pdf]
