# Supplementary material for: MRCNN: a deep learning model for regression of genome-wide DNA methylation
Source: PubMed Central journal article supplement (PMC6457069; doi:10.1186/s12864-019-5488-5), 2019-04-04

**Additional file 2. Comparison of the comprehensive classification performance metrics including ACC and AUC on different size of test subsets.**

The three models were tested using different groups of test sets. Each group contained 5 subsets with 1000,2000,3000,4000, and 5000 CpG loci from the whole genomes, respectively.

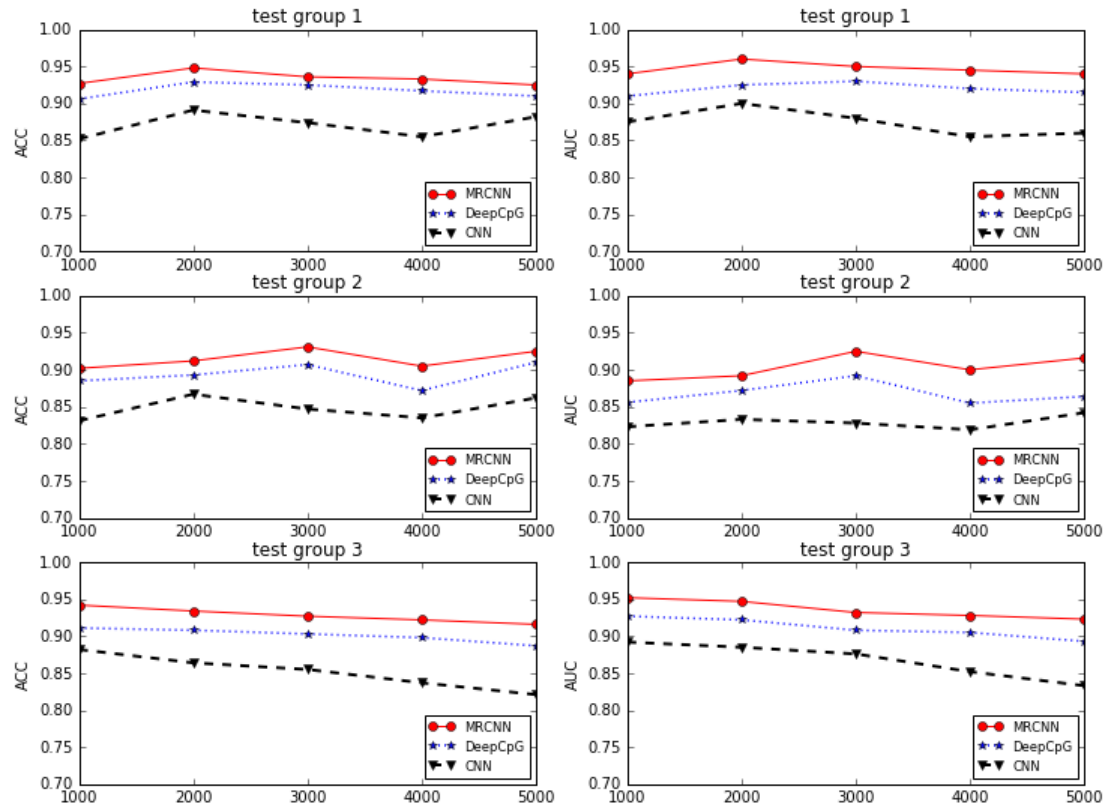

Supplement: 12864_2019_5488_MOESM2_ESM.pdf [file 12864_2019_5488_MOESM2_ESM.pdf]
