# Supplementary material for: MRCNN: a deep learning model for regression of genome-wide DNA methylation
Source: PubMed Central journal article supplement (PMC6457069; doi:10.1186/s12864-019-5488-5), 2019-04-04

### Additional file 3. Comparison of the classification performances in three cancerous tissues.

Among them, Brain\_tumor represents human brain astroglioma, Lung\_tumor represents H157 non-small cell lung cancer, and Colon\_tumor represents colon cancer. MRCNN also achieved good prediction results in the cancer dataset, indicating that the model is also robust in face of complex methylation mechanisms.

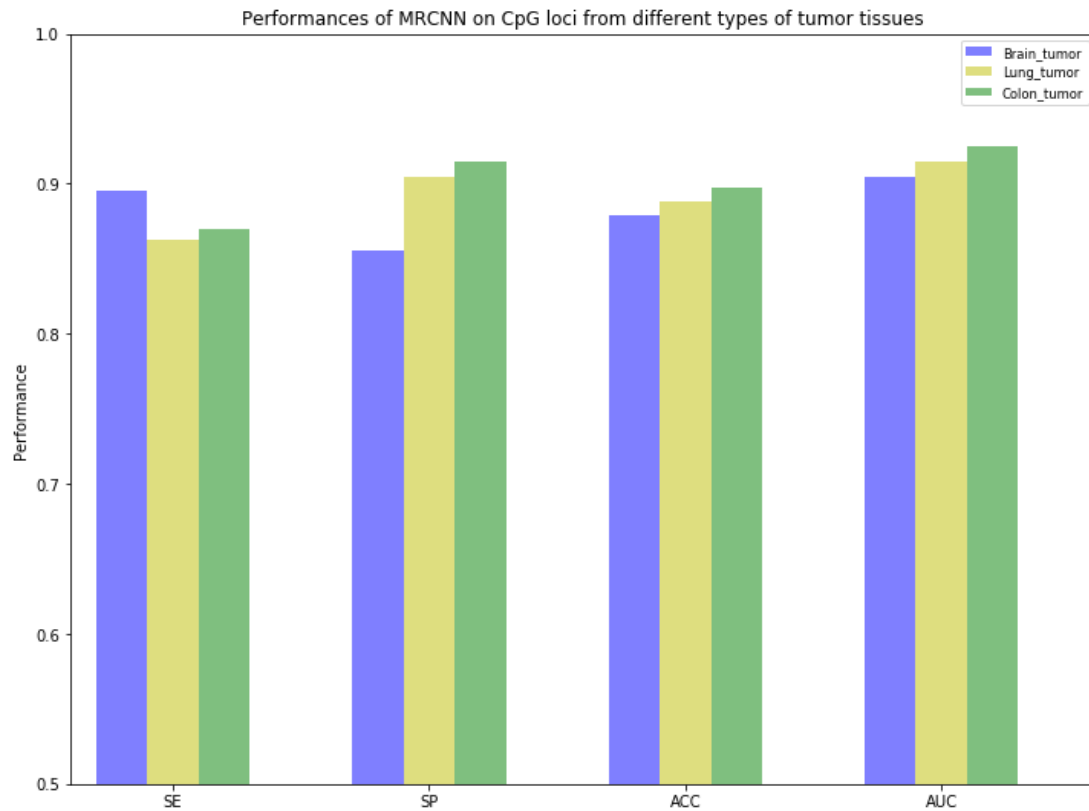

Supplement: 12864_2019_5488_MOESM3_ESM.pdf [file 12864_2019_5488_MOESM3_ESM.pdf]
